# Supplementary material for: Distinct Responses to IL4 in Macrophages Mediated by JNK
Source: MDPI journal article supplement (doi:10.3390/cells12081127), 2023-04-11
Supplement: s1 [file s1]

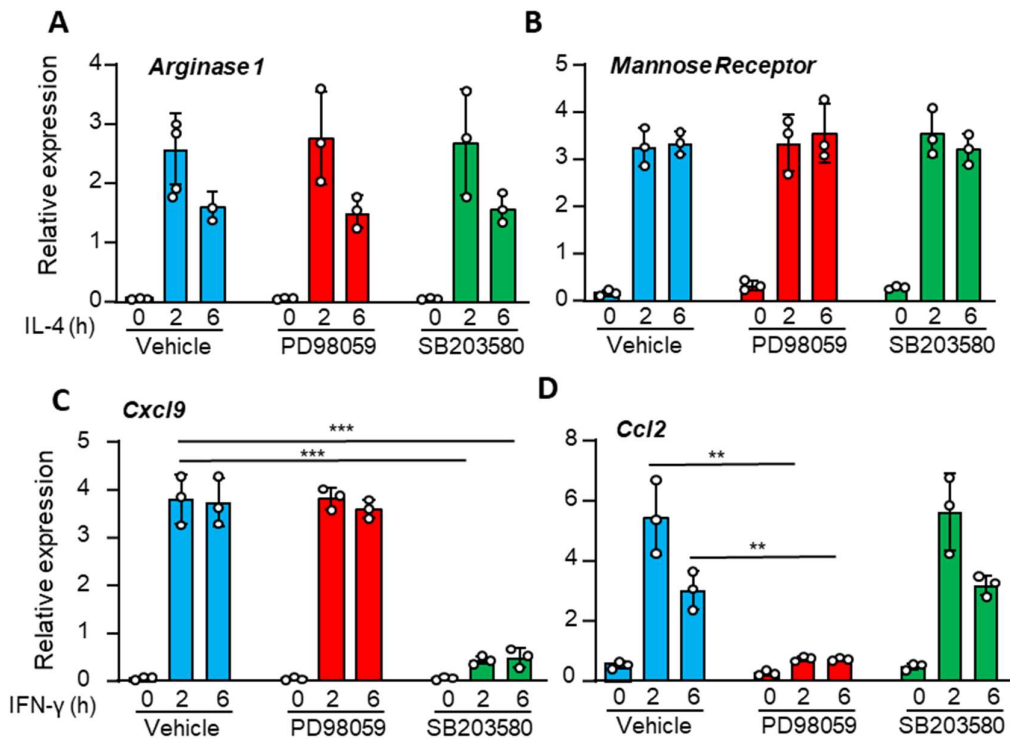

**Supplementary Material Figure S1.** Effects of MAPK inhibition on IL-4-mediated gene expression. A, Macrophages were preincubated for 1 h with inhibitors of MAPK signaling: PD98059 (50  $\mu$ M; to block ERK activation), SB203580 (5  $\mu$ M) (to inhibit p38), or vehicle (DMSO, as control). The cells were then stimulated for 2 or 6 h with IL-4. Control cells were left unstimulated. A and B *Arginase 1* and *Mannose Receptor* genes that are IL-4-JNK dependent (Figure 3), but ERK (PD98059 inhibitor) and p38 (SB203580) independent. C and D, Controls genes. *Cxcl9* is IL-4-p38 dependent and *Ccl2* is IL-4-ERK dependent (19).

**Supplementary Material Table S1.** Antibodies: identification, source, application and dilution used.

| Antibody                                | Identifier                        | Source          | Application           | Dilution |
|-----------------------------------------|-----------------------------------|-----------------|-----------------------|----------|
| Rabbit polyclonal anti-Stat6            | Cat# A11189; RRID: AB_2758452     | Antibodies      | IP                    | 1:500    |
| Mouse anti-Stat6 (Tyr 641)              | Cat# 686002; RRID: AB_2616820     | Biologend       | Western blot and CHIP | 1:1000   |
| Goat anti-rabbit IgG (HRP)              | Cat#A17345; RRID: AB_2772522      | Antibodies      | Western blot          | 1:2000   |
| Goat anti-mouse HRP-conjugated IgG      | Cat# ab6789; RRID: AB_955439      | Abcam           | Western blot          | 1:1000   |
| Mouse anti $\beta$ -actin IgG1          | Cat# A5441; RRID: AB_476744       | Sigma-Aldrich   | Western blot          | 1:1000   |
| Mouse anti-phosphoreine                 | Cat# ab7851; RRID: AB_306137      | Abcam           | Western blot          | 1:100    |
| Rabbit anti-ERK1/ERK2                   | Cat# AF1576; RRID: AB_354872      | R&D systems     | Western blot          | 1:500    |
| Rabbit anti-phospho-p38 (Thr180/Tyr182) | Cat# 9211; RRID: AB_331641        | Cell Signalling | Western blot          | 1:1000   |
| Rabbit polyclonal anti-JNK1             | Cat# PA5-17889; RRID: AB_10982589 | Invitrogen      | Western blot          | 1:1000   |
| Rabbit IgG anti-anti-KAT3B / p300       | Cat# ab10485; RRID: AB_297224     | Abcam           | IP and CHIP           | 1:100    |
| Rabbit IgG                              | Cat# 31887; RRID: AB_2532177      | Invitrogen      | Control CHIP          | 1:100    |
| Mouse IgG                               | Cat# 14-4714-82; RRID:AB_470111   | eBioscience     | Control CHIP          | 1:100    |

**Supplementary Material Table S2.** Primer sequences for the various quantitative PCRs performed.

| Transcript          | Forward Primer               | Reverse Primer                |
|---------------------|------------------------------|-------------------------------|
| MKP-1               | 5' GGACAACCACAAGGCAGACATC 3' | 5' GGCCTGGCAATGAACAAACA 3'    |
| MKP-2               | 5' TCGAAGACAACCACAAGGC 3'    | 5' GGAAGCTGAAGACGAACTGC 3'    |
| MKP-3               | 5' TCGTCACACATCGAATCTGC 3'   | 5' CAATGTCCGAGGAAGAGTCC 3'    |
| MKP-4               | 5' CCATCTCTGACCATTGGAGC 3'   | 5' AGGCATCGTTGAGTGAGAGG 3'    |
| MKP-5               | 5' ACTTGATGAAGCACACACGG 3'   | 5' TAAGGATTCTTGCGGTCACG 3'    |
| MKP-7               | 5' ATGGATGGTCCTTTGGCTAGG 3'  | 5' CTCCTCACAAATCAAGCCTGTCA 3' |
| PAC-1               | 5' AGGCGGTTTCAAAAGCTTCC 3'   | 5' GGTGAGAGTTGCTATTTTCGGC 3'  |
| CPG21               | 5' ATGAAGACCAAGCAGTTCCGG 3'  | 5' ACTGAAGGAGCTGTCCCATGAA 3'  |
| Arginase 1          | 5' TTGCGAGACGTAGACCCTGG 3'   | 5' CAAAGCTCAGGTGAATCGGC 3'    |
| CCL22               | 5' CTTCTGGACCTCAAAATCCTGC 3' | 5' TAGCTTCTTCACCCAGACCTGC 3'  |
| CCL24               | 5' TTGCTGCACGTCCTTTATTTC 3'  | 5' TGGCCCTTCTGGTGATGAA 3'     |
| IL-10               | 5' CAAGGAGCATTGAATCCCTG 3'   | 5' TGCTCCACTGCCTTGCTCTTA 3'   |
| Mannose receptor    | 5' GCTGAATCCCAGAAATCCGC 3'   | 5' ATCAGGCATACAGGGTGAC 3'     |
| CD163               | 5' CTCTGTTAGCTATTGGACGC 3'   | 5' CGGAATTTCTGGGATTCAGCTT 3'  |
| SOCS1               | 5' GCATCCCTCTTAACCCGGTACT 3' | 5' ATAAGGCGCCCCACTTAATG       |
| p21 <sup>Waf1</sup> | 5' GAGCAAAGTGTGCCGTTGTCTC 3' | 5' TCAAAGTTCCACCGTTCTCGG 3'   |
| c-myc               | 5' AACAGCTTCGAAACTCTGGTGC 3' | 5' CGC ATCAGTTCTGTCAGAAGGA 3' |
| Hprt1               | 5' ATCATTATGCCGAGGATTTGG 3'  | 5' GCAAAGAACTTATAGCCCCC 3'    |
| L14                 | 5' TCCCAGGCTGTTAACGCGGT.3'   | 5' GCGCTGGCTGAATGCTCTG 3'     |
| Sdha                | 5' TGGGGAGTGCCGTGGTGTCA 3'   | 5' CATGGCTGTCCGTCCCCTG 3'     |
| Cxcl9               | 5' GATAAGGAATGCACGATGCTC 3'  | 5 TCTCCGTTCTTCAGTGAGCAA 3'    |
| Ccl2                | 5' AGGTCCTGTGTCATGCTTCTG 3'  | 5' GCTGCTGGTGATCCTTGT 3'      |
